# Supplementary material for: Airborne Measurements Reveal the Underestimated Impact of Black Carbon Emissions from Ships
Source: Research Square preprint supplement (doi:10.21203/rs.3.rs-6411226/v1), 2025-04-10
Supplement: Supplementary file 1 [file e123b6d8bfc8a69a51b65fa5.pdf]

# Supplementary material

## Airborne Measurements Reveal the Underestimated Impact of Black Carbon Emissions from Ships

**Ward Van Roy<sup>\*a</sup>, Jean-Baptiste Merveille<sup>a</sup>, Kobe Scheldeman<sup>a</sup>, Annelore Van Nieuwenhove<sup>a</sup>, Ronny Schallier<sup>a</sup>**

<sup>a</sup> Royal Belgian Institute of Natural Sciences, Vautierstraat 29, 1000 Brussels, Belgium

*\*Corresponding author: Ward Van Roy*  
(wvanroy@naturalsciences.be)

### Contents

|                             |    |
|-----------------------------|----|
| Supplementary figures ..... | 2  |
| Supplementary tables .....  | 12 |

## Supplementary figures

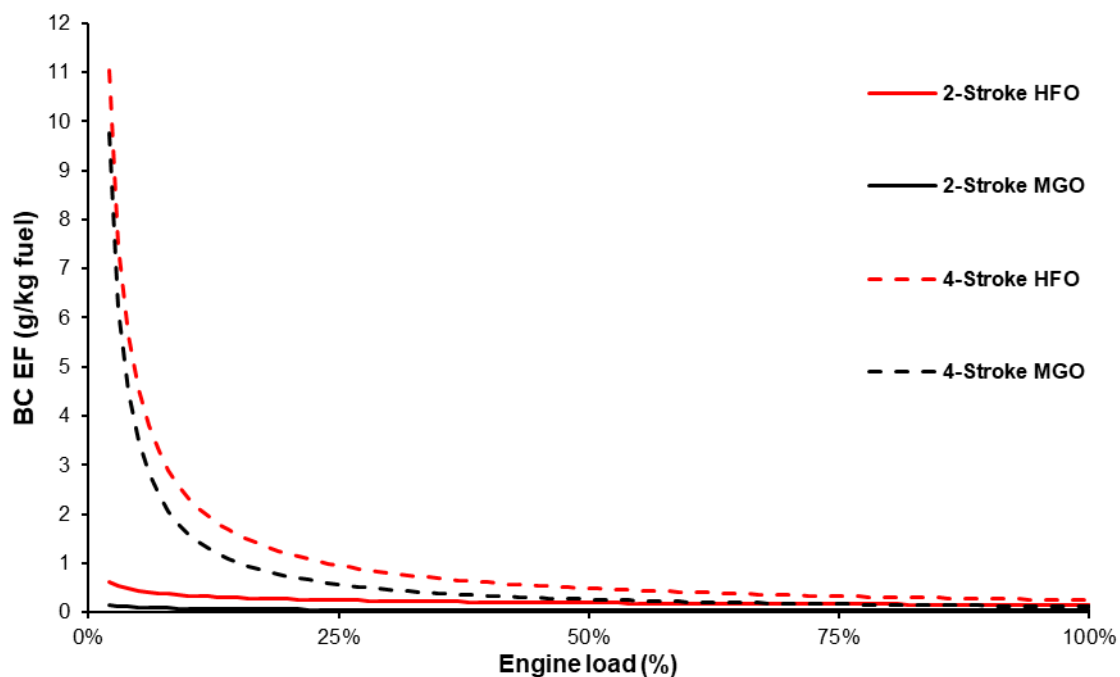

Supplementary figure 1. BC EFs in function of engine load based on a power function (derived from IMO) <sup>32</sup>.

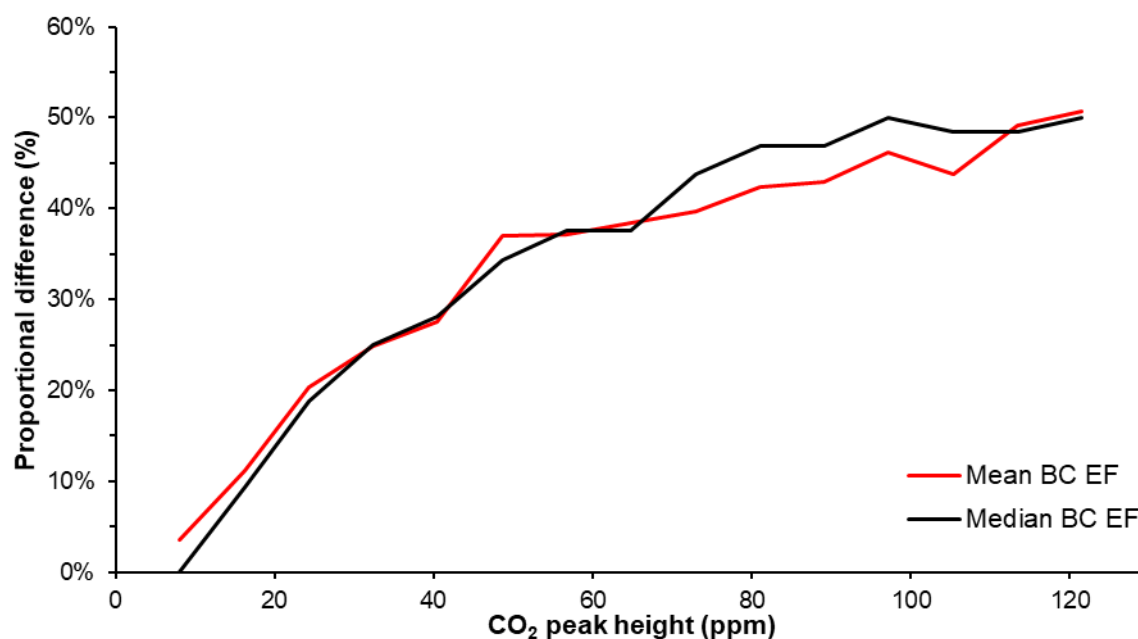

Supplementary figure 2. Impact of the peak height of CO<sub>2</sub> on the observed mean and median BC EFs.

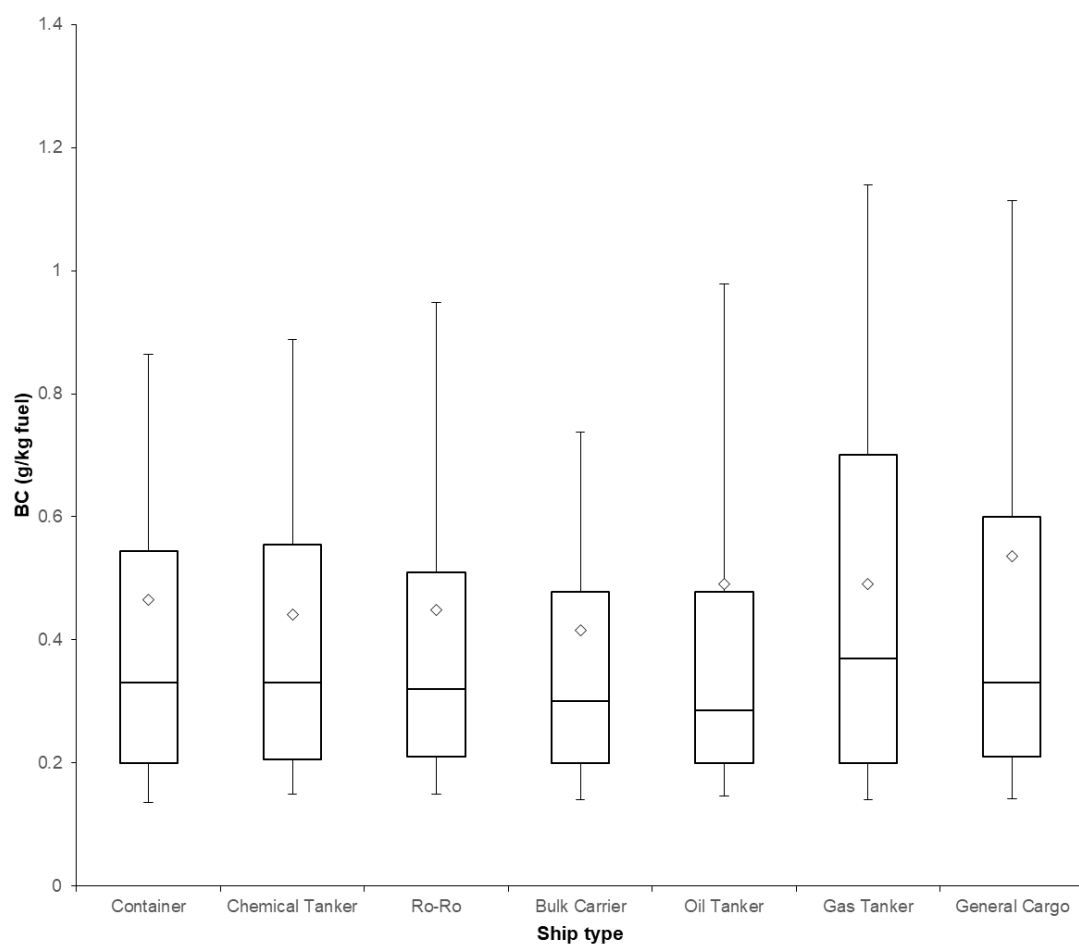

**Supplementary figure 3. Box plot of median, 10, 25, 75 and 90% percentiles and mean (◇) BC EFs according to ship type.**

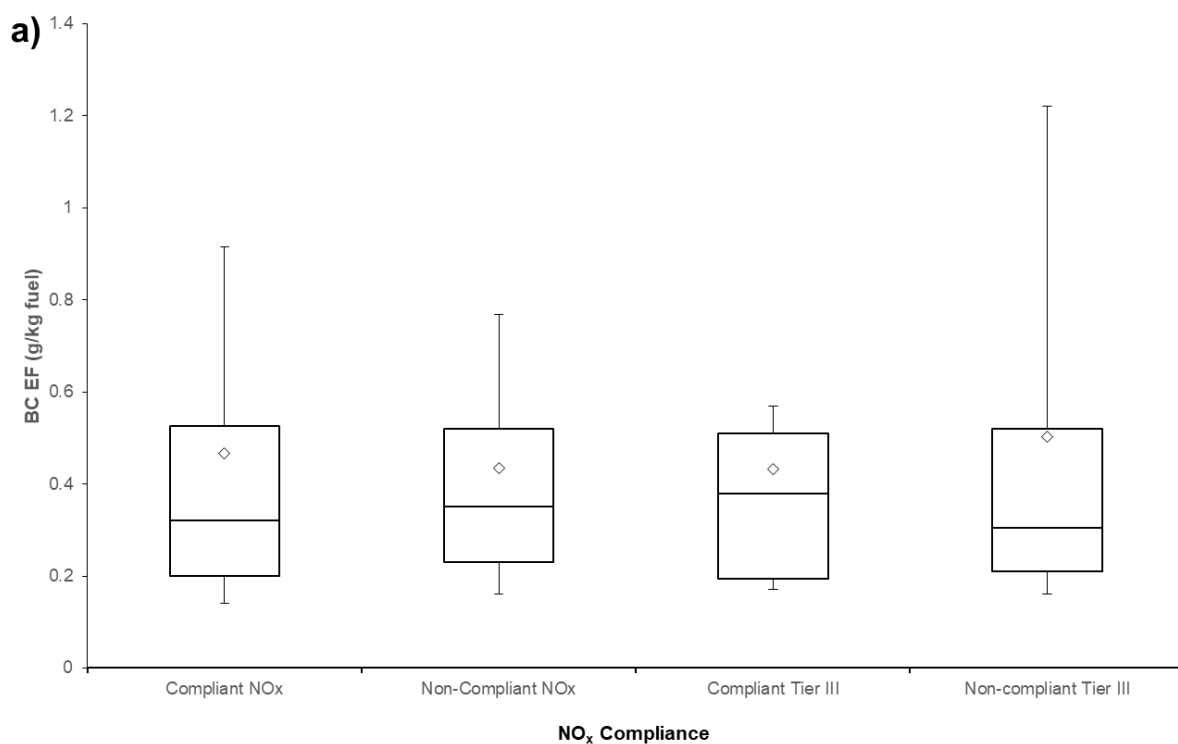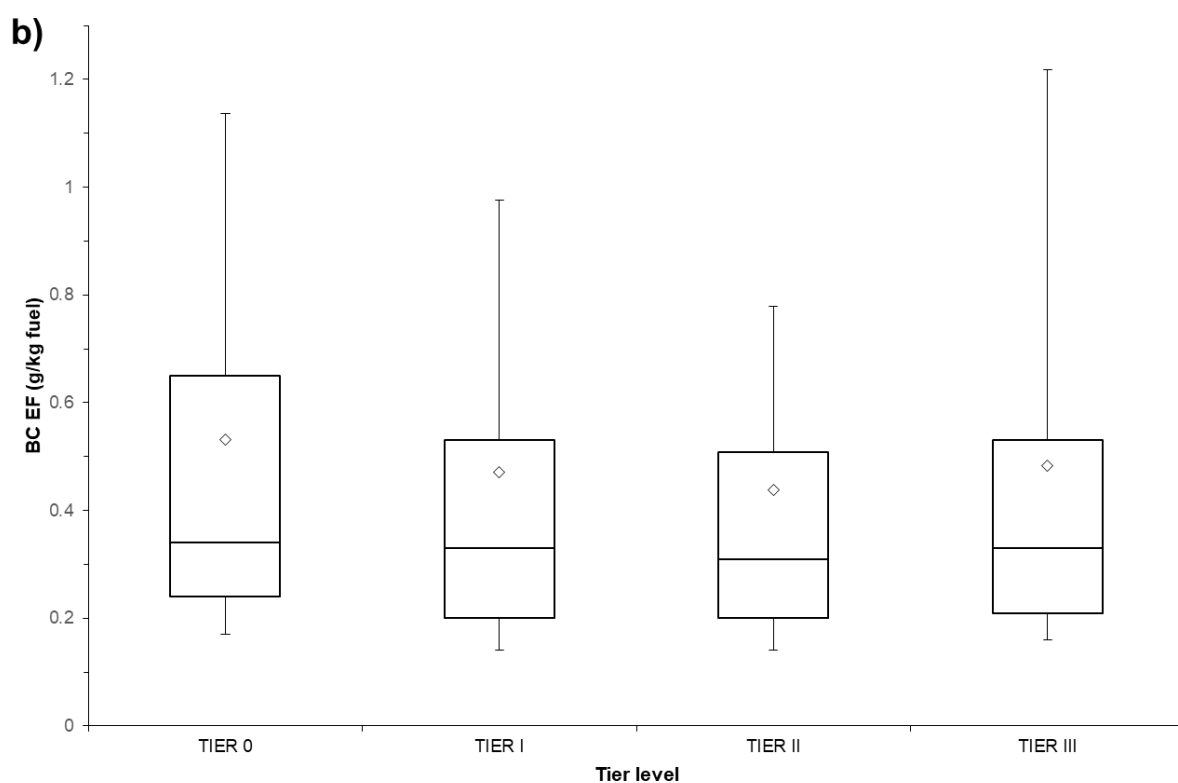

**Supplementary figure 4. Box plot of median, 10, 25, 75 and 90% percentiles and mean (◇) BC EFs according to the NO<sub>x</sub> compliance level (a) and the NO<sub>x</sub> tier level (b).**

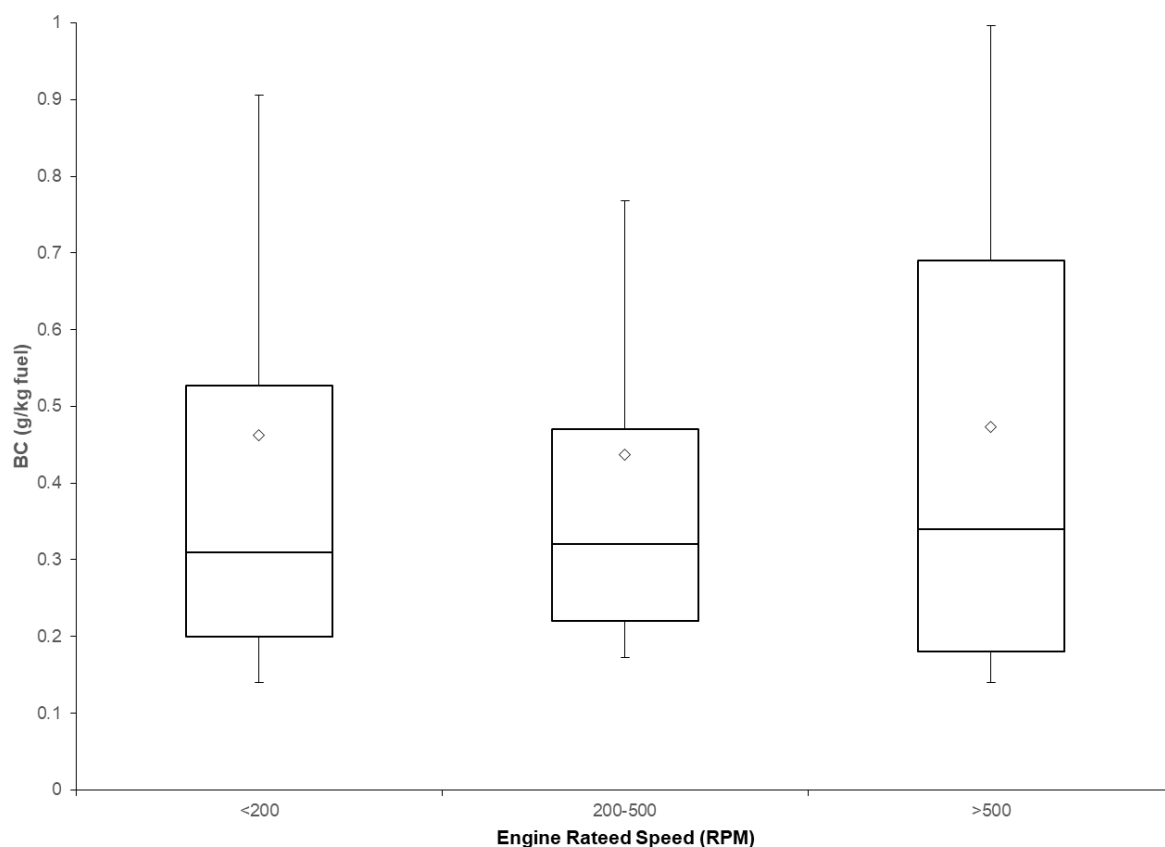

Supplementary figure 5. Box plot of median, 10, 25, 75 and 90% percentiles and mean ( $\diamond$ ) BC EFs according to the engine rated speed (RPM).

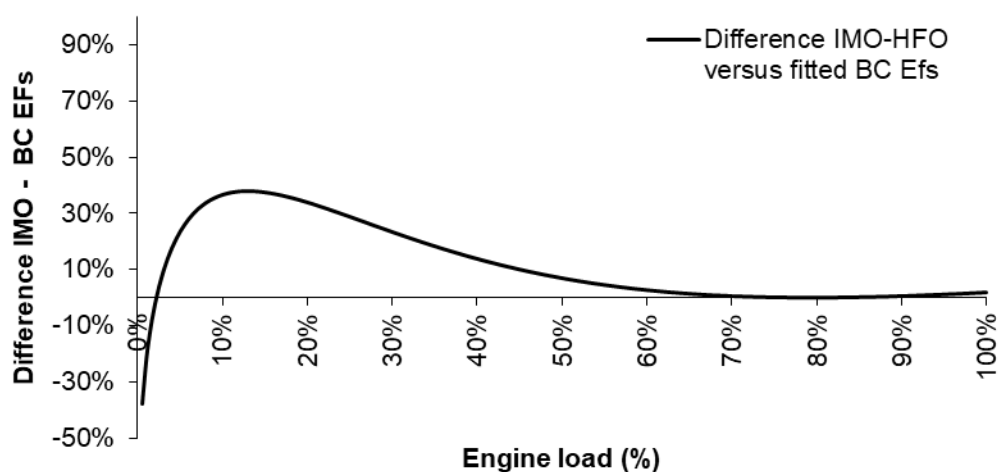

Supplementary figure 6. Difference between IMO power function and the modeled BC EFs based on an exponential decay distribution.

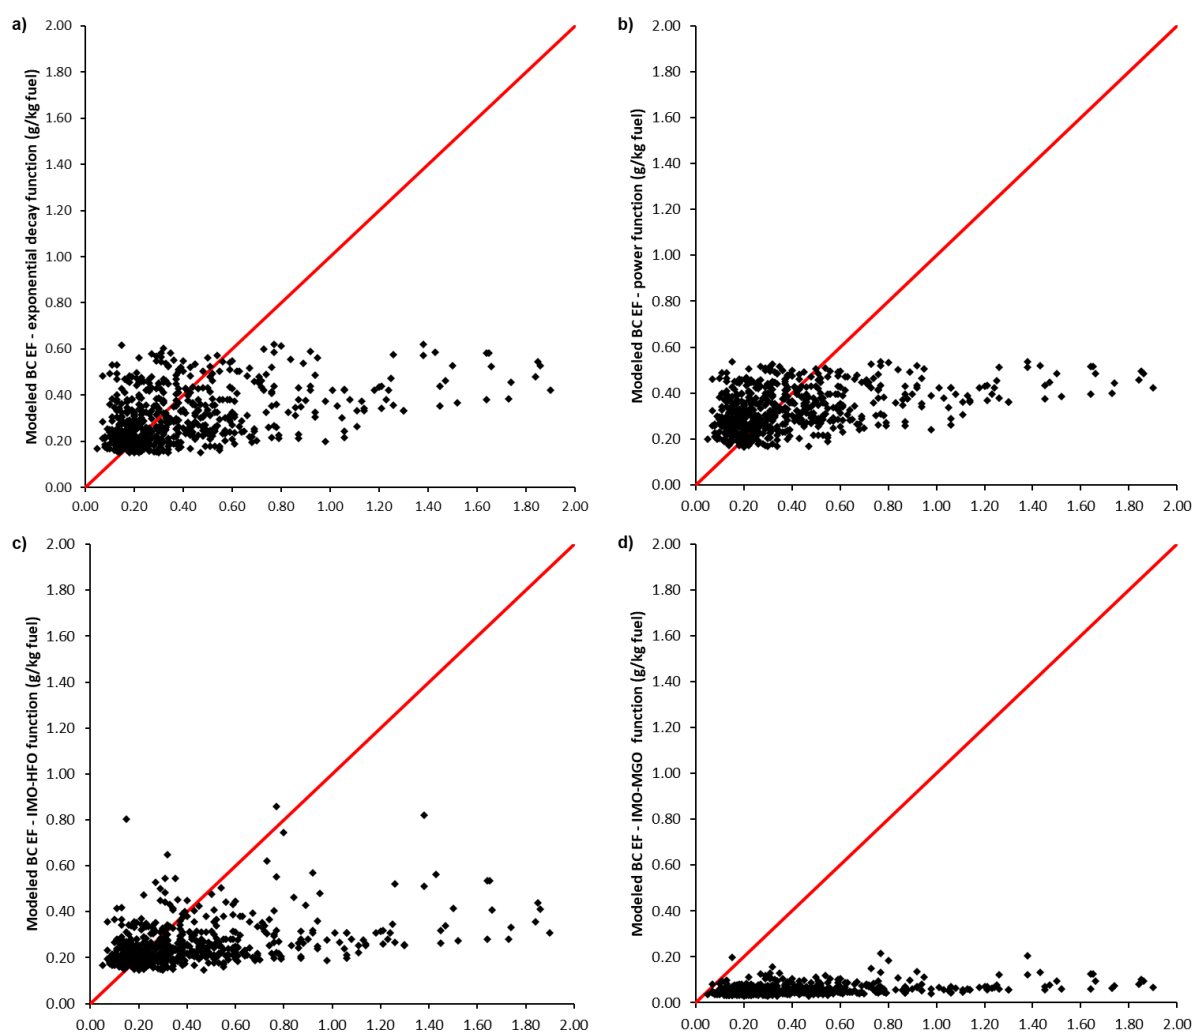

**Supplementary figure 7. Comparison of observed BC EFs versus modelled BC EFs based on the engine load for exponential decay function (a), modified power function (b), IMO HFO function (c) and IMO-MGO function (d).**

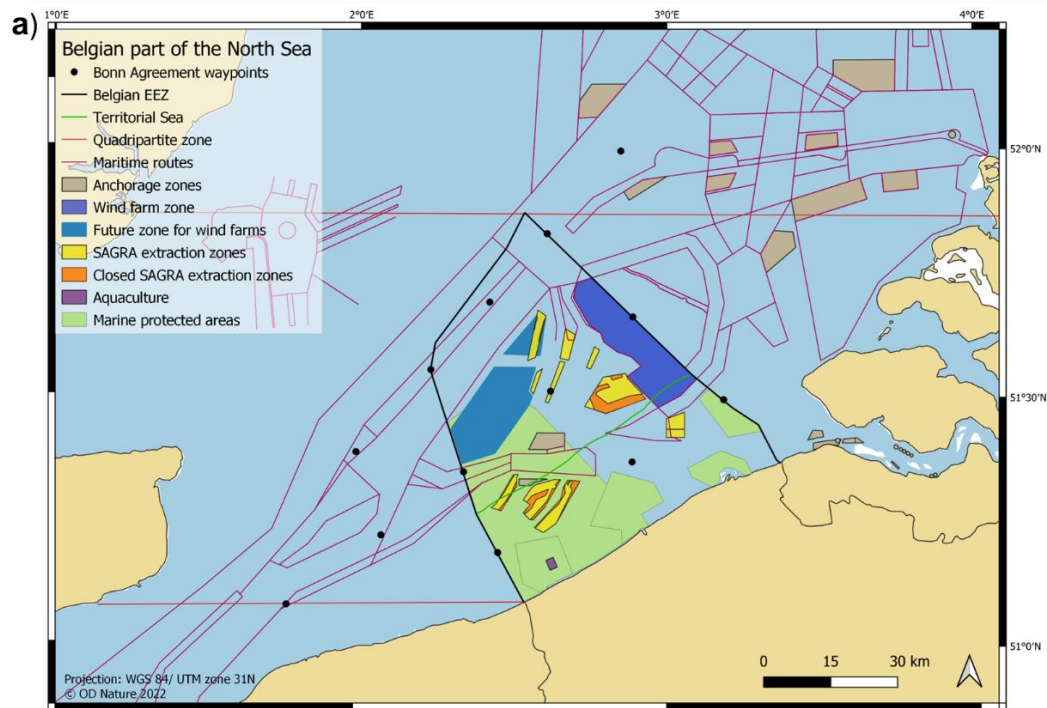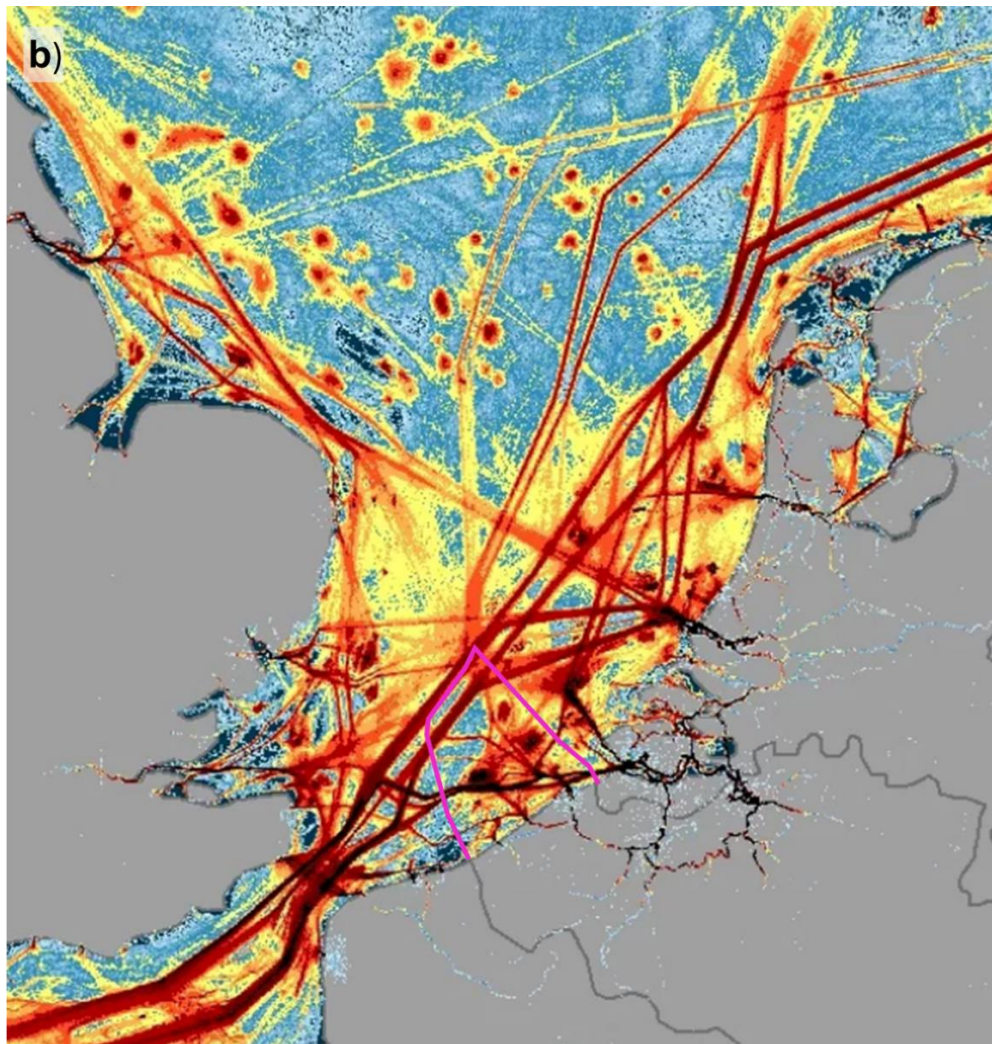

Supplementary figure 8. Map of the Belgian part of the north sea with the indication of the shipping lanes and dedicated spatial areas (a) and map of the north sea with the shipping density based on AIS traffic with delimitation of the Belgian part of the North sea (magenta) (b) <sup>72</sup>.



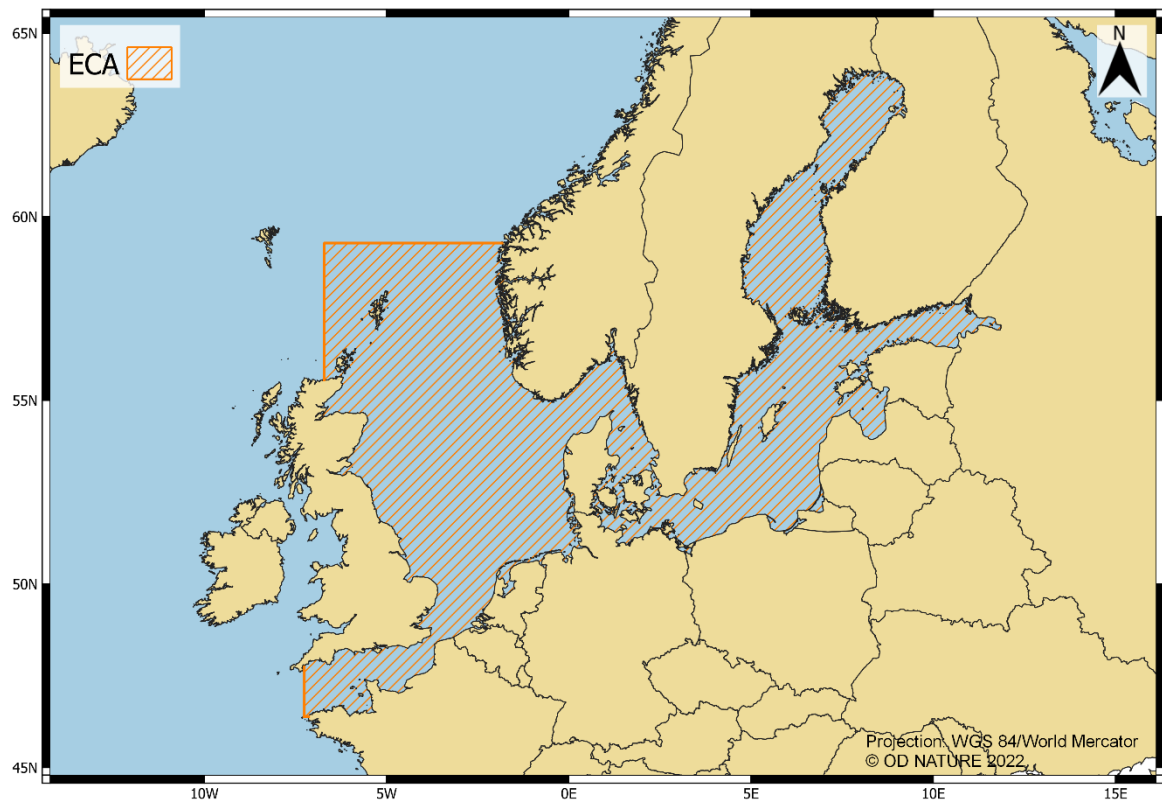

Supplementary figure 9. North Sea and Baltic Sea ECAs for both NO<sub>x</sub> (NECA) and SO<sub>x</sub> (SECA)

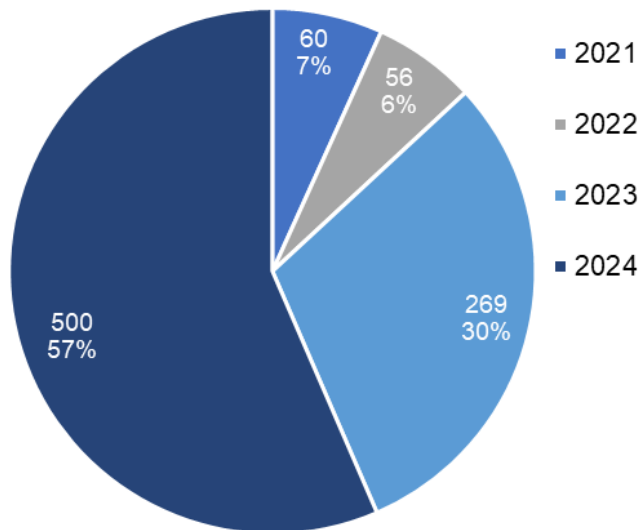

Supplementary figure 10. Distribution of the observed ships per year.

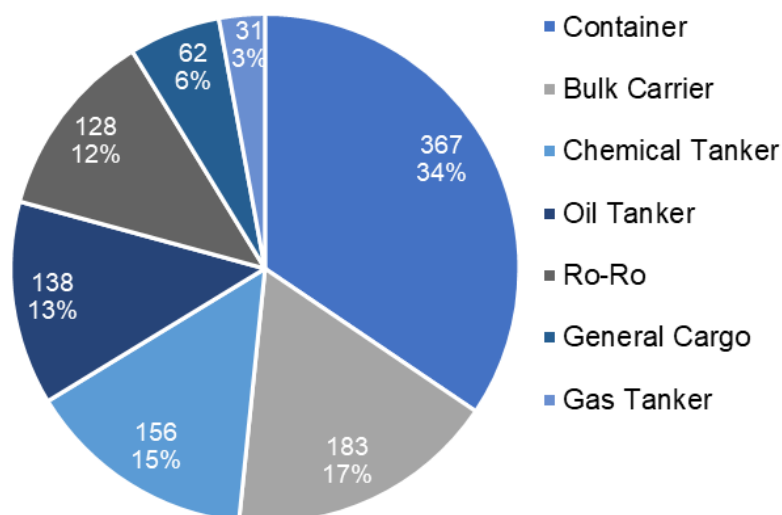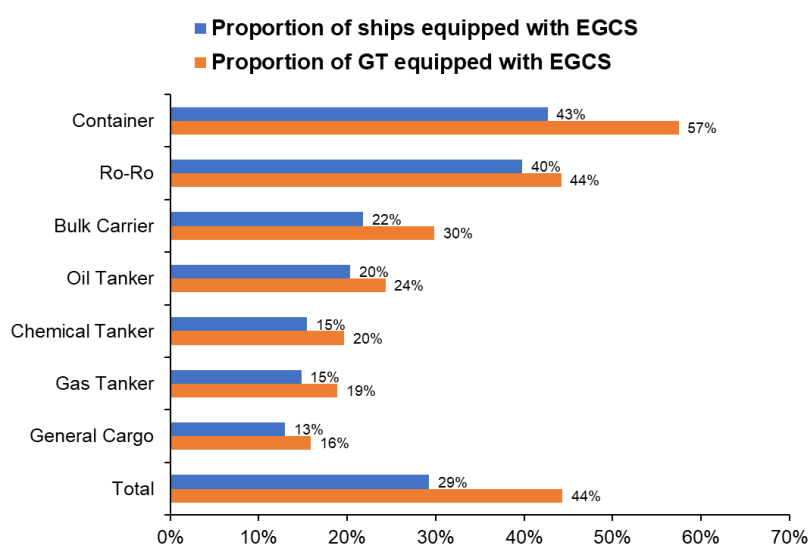

**Supplementary figure 11. Distribution of the observed ship types, and the proportion equipped with an EGCS.**

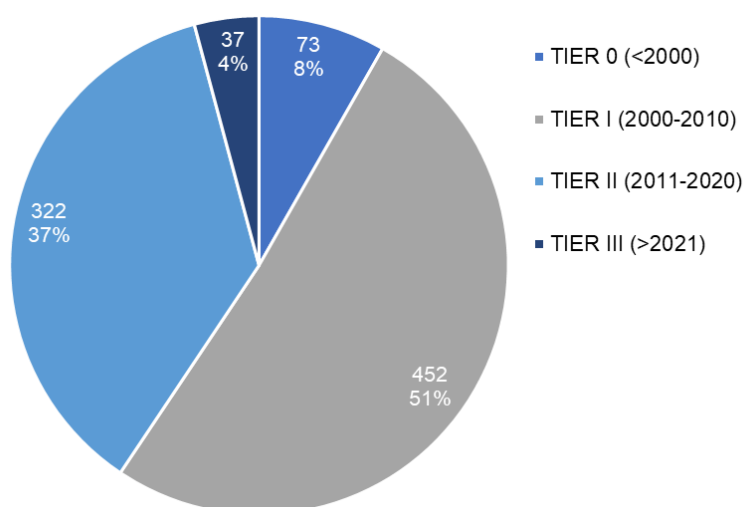

**Supplementary figure 12. Distribution of the observed ships according to their Tier level.**

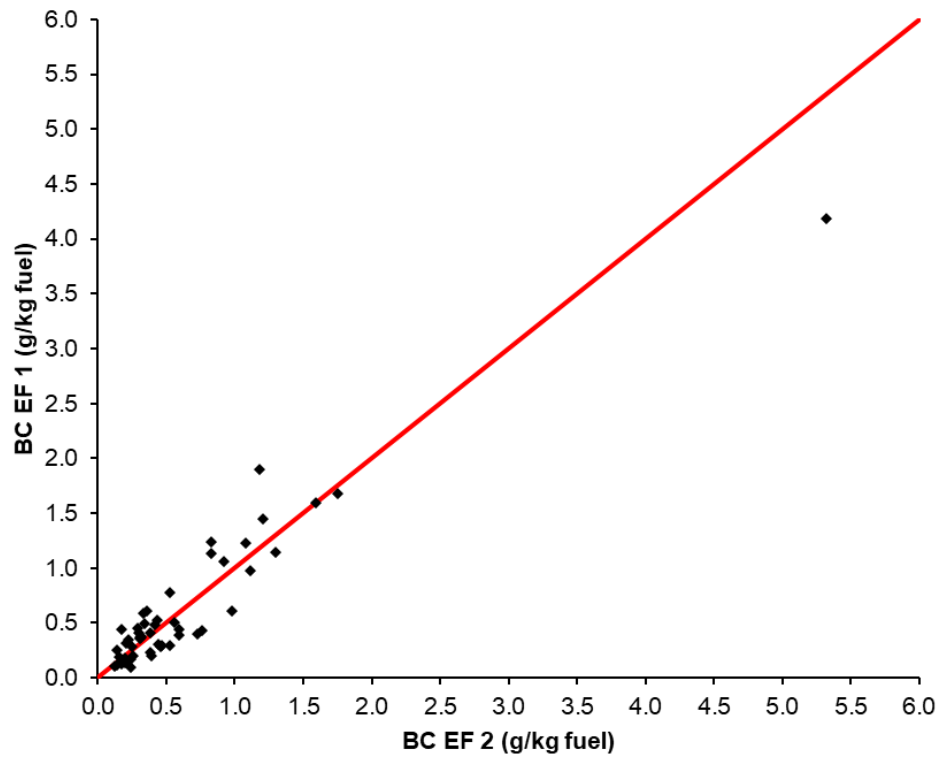

Supplementary figure 13. Regression between repeated measurements showing a good correlation ( $R^2 = 0.93$ ), with the red line  $y = x$  as reference.

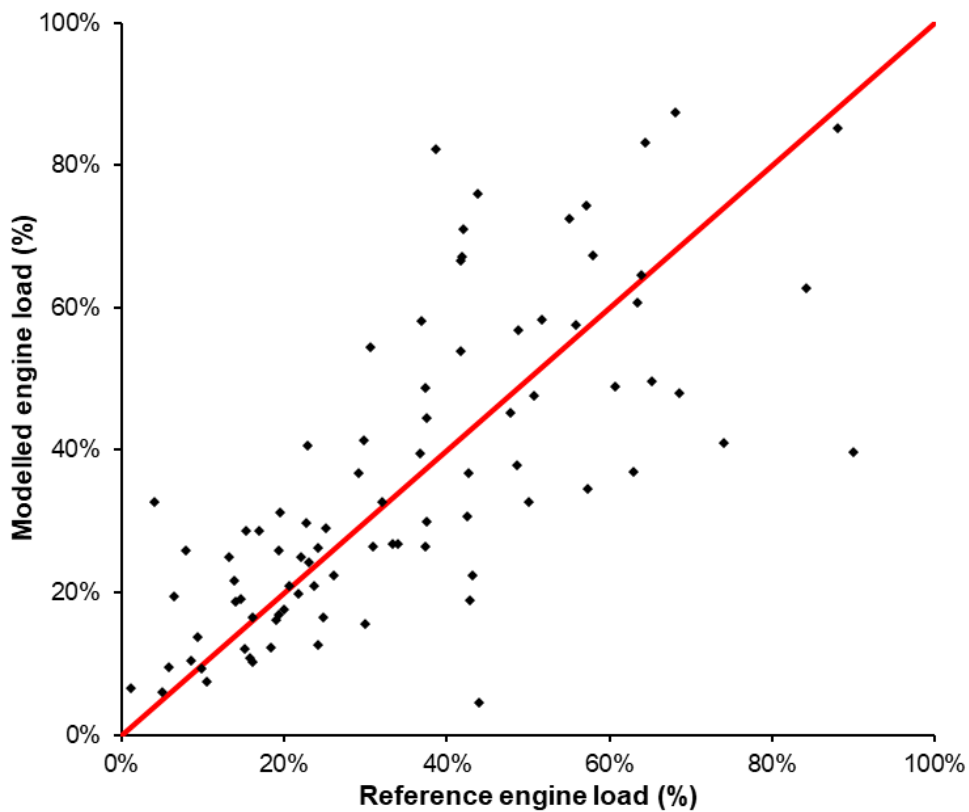

Supplementary figure 14. Correlation between the modelled engine load and the reference engine load. For the modelled engine load the propellor law was used, for the reference engine loads, radio communication with the ship was established to obtain the present power use of the main engine.

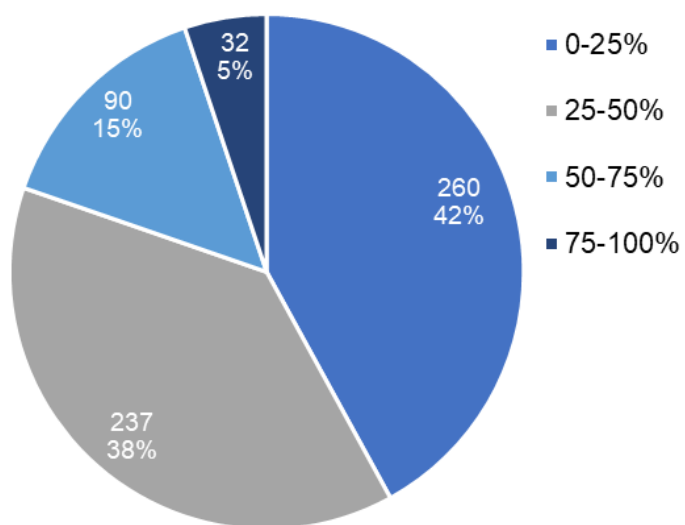

**Supplementary figure 15. Distribution of the engine loads used by the observed ships.**

## Supplementary tables

**Supplementary table 1. BC EFs from literature** <sup>3,4,26–29,47,73–77</sup>

| Study           | Year | BC EF<br>(g/kg fuel) |
|-----------------|------|----------------------|
| Bond et al.     | 2013 | 0.17-0.85            |
| Petzhold et al. | 2008 | 0.179                |
| Sinha et al.    | 2003 | 0.16-0.2             |
| Lack et al.     | 2008 | 0.38-0.97            |
| Eyring et al.   | 2010 | 0.53                 |
| Dentener et al. | 2006 | 0.69                 |
| Corbet et al.   | 2010 | 0.37                 |
| Peters et al.   | 2011 | 0.35                 |
| Winther et al.  | 2014 | 0.35                 |
| Comer et al.    | 2017 | 0.30-0.56            |
| Fuglestedt      | 2010 | 1.08                 |

**Supplementary table 2. Statistical tests comparing BC EFs between groups of engine loads.**

| Tested variables<br>(Engine load)    | Mann-<br>Whitney | Kolmogorov-<br>Smirnov | Kruskal-<br>Wallis | <i>n</i><br>group 1 | <i>n</i><br>group 2 |
|--------------------------------------|------------------|------------------------|--------------------|---------------------|---------------------|
| Between all groups ( <i>n</i> = 609) | -                | -                      | 0.000              |                     |                     |
| 0-25% vs 25-50%                      | 0.000000         | <i>p</i> < 0.001       |                    | 253                 | 234                 |
| 25-50% vs 50-75%                     | 0.000866         | <i>p</i> < 0.005       |                    | 234                 | 90                  |
| 50-75% vs 75-10%                     | 0.426926         | <i>p</i> > 0.1         |                    | 90                  | 32                  |

**Supplementary table 3. Statistical tests comparing BC EFs between compliance and EGCS.**

| Tested variables<br>(FSC Compliance / EGCS)     | Mann-<br>Whitney | Kolmogorov-<br>Smirnov | Kruskal-<br>Wallis | <i>n</i><br>group 1 | <i>n</i><br>group 2 |
|-------------------------------------------------|------------------|------------------------|--------------------|---------------------|---------------------|
| Compliance/EGCS all groups                      |                  |                        | 0.0000             |                     |                     |
| Compliance levels all groups                    |                  |                        | 0.0013             |                     |                     |
| Compliant vs non compliant                      | 0.000306         | <i>p</i> < 0.001       |                    | 814                 | 72                  |
| Green vs orange                                 | 0.009193         | <i>p</i> < 0.1         |                    | 814                 | 46                  |
| Orange vs red                                   | 0.549902         | <i>p</i> > 0.1         |                    | 46                  | 26                  |
| EGCS vs Non-EGCS                                | 0.000078         | <i>p</i> < 0.001       |                    | 627                 | 259                 |
| Compliant non EGCS vs<br>compliant EGCS         | 0.000052         | <i>p</i> < 0.001       |                    | 591                 | 223                 |
| Compliant non-EGCS vs<br>Non-compliant non-EGCS | 0.000172         | <i>p</i> < 0.001       |                    | 591                 | 36                  |
| Compliant non-EGCS vs<br>Non-compliant EGCS     | 0.019414         | <i>p</i> > 0.1         |                    | 591                 | 36                  |
| Compliant EGCS vs<br>Non-compliant non-EGCS     | 0.052641         | <i>p</i> > 0.1         |                    | 223                 | 36                  |
| Compliant EGCS vs<br>Non-compliant EGCS         | 0.510425         | <i>p</i> > 0.1         |                    | 223                 | 36                  |
| Non-compliant non-EGCS vs<br>Non-compliant EGCS | 0.376537         | <i>p</i> > 0.1         |                    | 36                  | 36                  |

**Supplementary table 4. Statistical tests comparing BC EFs between ship types.**

| Tested variables<br>(Ship type)      | Mann-Whitney | Kolmogorov-Smirnov | Kruskal-Wallis | <i>n</i><br>group 1 | <i>n</i><br>group 2 |
|--------------------------------------|--------------|--------------------|----------------|---------------------|---------------------|
| Between all groups ( <i>n</i> = 886) |              |                    | 0.4356         | 886                 |                     |
| Container vs oil tanker              | 0.404918     | $p > 0.1$          |                | 307                 | 118                 |
| Container vs RO-RO                   | 0.816666     | $p > 0.1$          |                | 307                 | 109                 |
| Container vs Chemical tanker         | 0.633366     | $p > 0.1$          |                | 307                 | 123                 |
| Container vs General cargo           | 0.663689     | $p > 0.1$          |                | 307                 | 54                  |
| Container vs Bulk Carrier            | 0.305751     | $p > 0.1$          |                | 307                 | 142                 |
| Container vs Gas Tanker              | 0.661682     | $p > 0.1$          |                | 307                 | 27                  |
| Oil tanker vs RO-RO                  | 0.504422     | $p > 0.1$          |                | 118                 | 109                 |
| Oil tanker vs Chemical Tanker        | 0.273043     | $p > 0.1$          |                | 118                 | 123                 |
| Oil tanker vs General Cargo          | 0.436187     | $p > 0.1$          |                | 118                 | 54                  |
| Oil tanker vs Bulk Carrier           | 0.490339     | $p > 0.1$          |                | 118                 | 142                 |
| Oil tanker vs Gas Tanker             | 0.404918     | $p > 0.1$          |                | 118                 | 27                  |
| RO-RO vs Chemical Tanker             | 0.577112     | $p > 0.1$          |                | 109                 | 123                 |
| RO-RO vs General Cargo               | 0.689025     | $p > 0.1$          |                | 109                 | 54                  |
| RO-RO vs Bulk Carrier                | 0.497819     | $p > 0.1$          |                | 109                 | 142                 |
| RO-RO vs Gas Tanker                  | 0.666479     | $p > 0.1$          |                | 109                 | 27                  |
| Chemical tanker vs General Cargo     | 0.891036     | $p > 0.1$          |                | 123                 | 54                  |
| Chemical tanker vs Bulk Carrier      | 0.197146     | $p > 0.1$          |                | 123                 | 142                 |
| Chemical tanker vs Gas Tanker        | 0.885258     | $p > 0.1$          |                | 123                 | 27                  |
| General Cargo vs Bulk Carrier        | 0.330863     | $p > 0.1$          |                | 54                  | 142                 |
| General Cargo vs Gas Tanker          | 0.972028     | $p > 0.1$          |                | 54                  | 27                  |
| Bulk Carrier vs Gas Tanker           | 0.400348     | $p > 0.1$          |                | 142                 | 27                  |

**Supplementary table 5. Statistical tests comparing BC EFs between NOx Tiers and NOx compliance**

| Tested variables<br>(NO <sub>x</sub> Tier and NO <sub>x</sub> Compliance) | Mann-Whitney | Kolmogorov-Smirnov | Kruskal-Wallis | <i>n</i><br>group 1 | <i>n</i><br>group 2 |
|---------------------------------------------------------------------------|--------------|--------------------|----------------|---------------------|---------------------|
| NO <sub>x</sub> tiers ( <i>n</i> = 886)                                   |              |                    | 0.4339         |                     |                     |
| Tier 0 vs Tier I                                                          | 0.463667     | $p > 0.1$          |                | 74                  | 453                 |
| Tier 0 vs Tier II                                                         | 0.137839     | $p > 0.1$          |                | 74                  | 322                 |
| Tier 0 vs Tier III                                                        | 0.721417     | $p > 0.1$          |                | 74                  | 37                  |
| Tier I vs Tier II                                                         | 0.240092     | $p > 0.1$          |                | 453                 | 322                 |
| Tier I vs Tier III                                                        | 0.810566     | $p > 0.1$          |                | 453                 | 37                  |
| Tier II vs Tier III                                                       | 0.482354     | $p > 0.1$          |                | 322                 | 37                  |
| NO <sub>x</sub> compliant vs<br>NO <sub>x</sub> non-compliant             | 0.323138     | $p > 0.1$          |                | 803                 | 83                  |
| Compliant Tier III vs<br>non-compliant Tier III                           | 0.854987     | $p > 0.1$          |                | 11                  | 26                  |

**Supplementary table 6. Statistical tests comparing BC EFs between engine types based on engine rated speed.**

| Tested variables<br>(ERS)    | Mann-Whitney | Kolmogorov-Smirnov | Kruskal-Wallis | <i>n</i><br>group 1 | <i>n</i><br>group 2 |
|------------------------------|--------------|--------------------|----------------|---------------------|---------------------|
| ERS groups ( <i>n</i> = 569) |              |                    | 0.6178         |                     |                     |
| <200 RPM vs 200-500 RPM      | 0.503229     | $p > 0.1$          |                | 458                 | 73                  |
| <200 RPM vs >2000 RPM        | 0.437284     | $p > 0.1$          |                | 458                 | 38                  |
| 200-500 RPM vs >2000 RPM     | 0.765390     | $p > 0.1$          |                | 73                  | 38                  |

**Supplementary table 7. Factors for power and exponential decay function of the real world BC EFs of all observed ships**

| Function | Factor | 25% | Median | Mean | 75% | 90% |
|----------|--------|-----|--------|------|-----|-----|
|----------|--------|-----|--------|------|-----|-----|

|                   |                |       |       |       |       |       |
|-------------------|----------------|-------|-------|-------|-------|-------|
| Power             | a              | -0.26 | -0.37 | -0.45 | -0.46 | -0.65 |
|                   | c              | 0.14  | 0.18  | 0.20  | 0.23  | 0.24  |
|                   | R <sup>2</sup> | 0.64  | 0.83  | 0.88  | 0.81  | 0.89  |
| Exponential decay | a              | 0.22  | 0.40  | 0.66  | 0.88  | 1.71  |
|                   | b              | 3.99  | 3.39  | 4.87  | 5.39  | 7.58  |
|                   | c              | 0.15  | 0.14  | 0.15  | 0.21  | 0.24  |
|                   | d              | 0.70  | 0.54  | 0.45  | 0.49  | 0.40  |
|                   | R <sup>2</sup> | 0.68  | 0.90  | 0.94  | 0.93  | 0.92  |

**Supplementary table 8. Factors for power and exponential decay function BC EFS of high concentration plumes**

| Function          | Factor         | Mean  |
|-------------------|----------------|-------|
| Power             | a              | -0.45 |
|                   | c              | 0.16  |
|                   | R <sup>2</sup> | 0.65  |
| Exponential decay | a              | 0.52  |
|                   | b              | 4.84  |
|                   | c              | 0.10  |
|                   | d              | 0.39  |
|                   | R <sup>2</sup> | 0.83  |

**Supplementary table 9. Supplementary uncertainty factors and the combined supplementary standard uncertainty.**

| Supplementary uncertainty factor            | Uncertainty (%) |
|---------------------------------------------|-----------------|
| CO <sub>2</sub> span gas drift (6 months)   | 0.92%           |
| CO <sub>2</sub> span gas concentration*     | 2.00%           |
| Measurement accuracy BC sensor              | 5.00%           |
| Measurement accuracy CO <sub>2</sub> sensor | 0.5%            |
| Uncertainty molar mass O                    | 1.88E-05        |
| Uncertainty molar mass C                    | 0.01%           |
| Uncertainty C content in marine fuel        | 0.83%           |
| Combined supplementary standard uncertainty | 5.55%           |

\* According to gas certificate

**Supplementary table 10. Correction factors used to model engine load with the propellor law**

| Ship type        | CF  | n  |
|------------------|-----|----|
| Bulk Carrier     | 1.1 | 12 |
| Chemical Tanker  | 0.7 | 6  |
| Container        | 1.0 | 51 |
| Gas Tanker       | 1.0 | 3  |
| Oil Tanker       | 0.6 | 7  |
| Passenger Vessel | 1.4 | 1  |
| Ro-Ro            | 1.0 | 5  |
